# Supplementary material
Source: PubMed Central journal article supplement (PMC9122033)
Supplement: NIHMS1671183-supplement-1.pdf [file NIHMS1671183-supplement-1.pdf]

## Supporting information for: “Thermodynamic stability of hnRNP A1 low complexity domain revealed by high-pressure NMR”

Jeffrey D. Levensgood<sup>1</sup>, Jake Peterson<sup>2</sup>, Blanton S. Tolbert<sup>1</sup> and Julien Roche<sup>2\*</sup>

<sup>1</sup>Department of Chemistry, Case Western Reserve University, Cleveland, Ohio 44106, United States

<sup>2</sup>Roy J. Carver Department of Biochemistry, Biophysics and Molecular Biology, Iowa State University, Ames, IA 50011, United States.

### Supporting Figures:

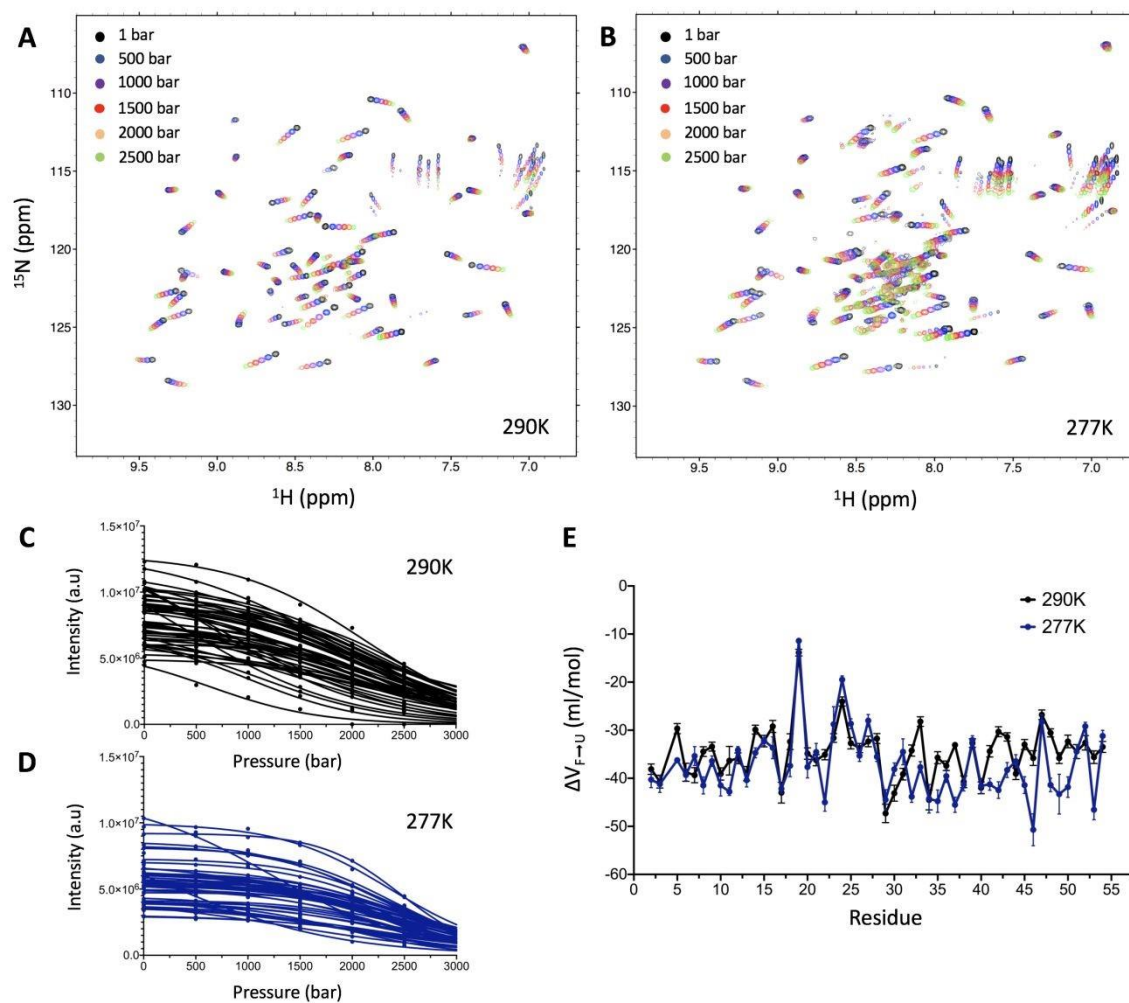

**Figure S1.** Pressure-induced unfolding of isolated GB1 domain.  $^1\text{H}$ - $^{15}\text{N}$  HSQC spectra of GB1 collected at 290 K (A) and 277 K (B) at pressure varying from 1 bar to 2,500 bar. Intensity profiles of individual GB1 crosspeaks were measured as a function of pressure at 290 K (C) and 277 K (D) and fitted to equation (3) (solid line) to obtain residue-specific  $\Delta V_{\text{FOU}}$  values. (E)  $\Delta V_{\text{FOU}}$  measured at 290 K (black line and dots) are displayed as a function of GB1 sequence and compared with  $\Delta V_{\text{FOU}}$  values measured at 277 K (blue line and dots).

Page 21 of 30

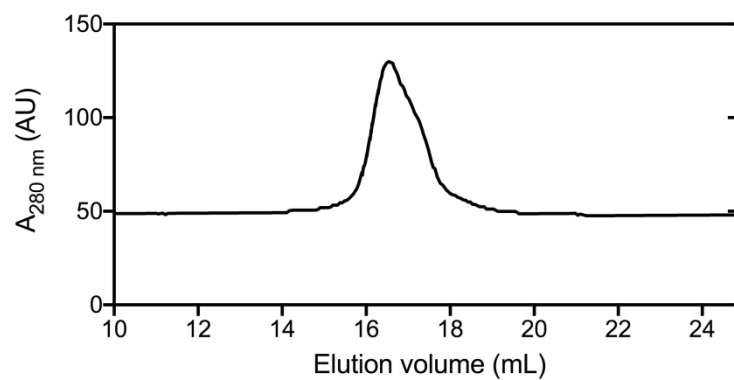

**Figure S2.** Analytical gel filtration column elution profile of GB1-LCD<sub>A1</sub> collected with a protein concentration of 150  $\mu\text{M}$ . The sample was run on Superdex 200 10/300 GL gel filtration column (GE healthcare life sciences) at 0.4 mL/min. The sample and column were kept at 277 K.

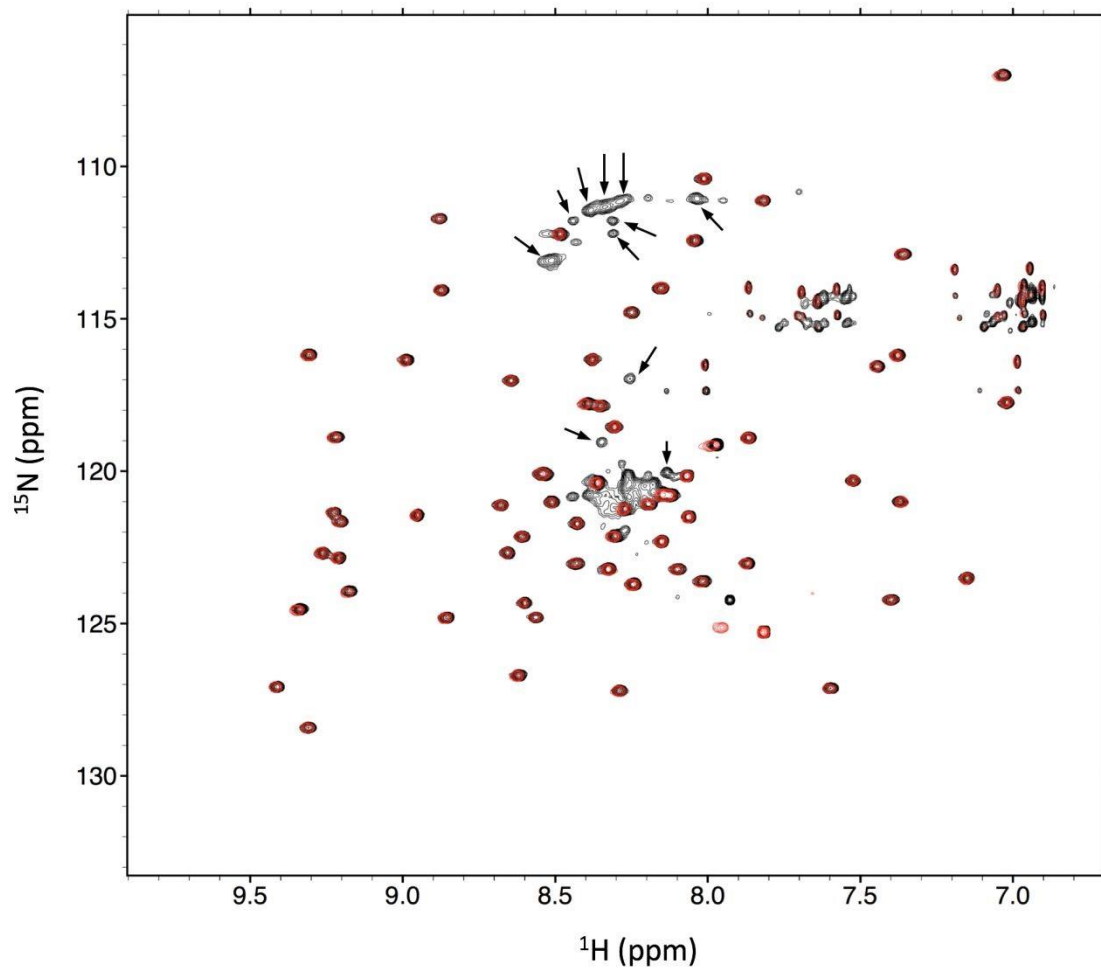

**Figure S3.** Comparison of  $^1\text{H}$ - $^{15}\text{N}$  HSQC spectra collected at 290 K for GB1 in GB1-LCD<sub>A1</sub> (black) and the isolated GB1 domain (red).

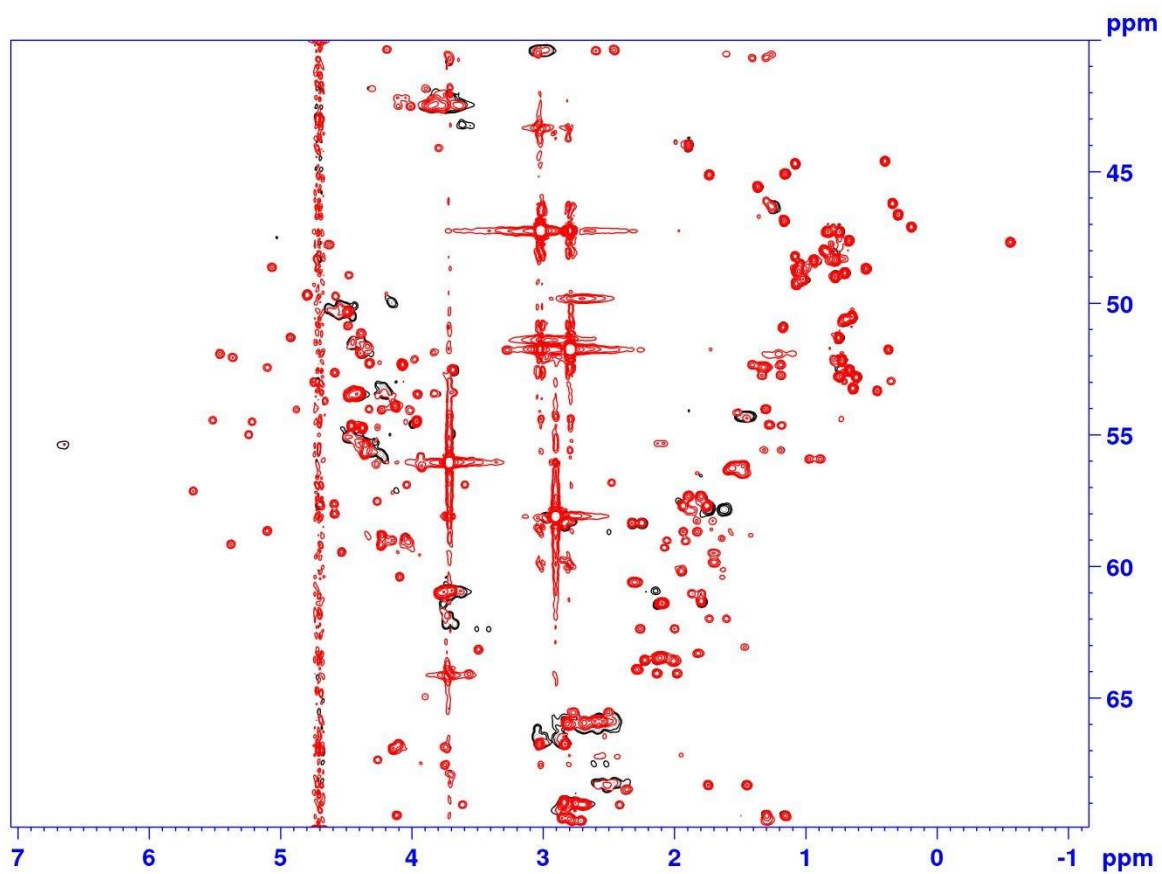

**Figure S3:** Overlaid <sup>1</sup>H-<sup>13</sup>C HSQC spectra of GB1 (in red) and GB1-LCD<sub>A1</sub> (in black) recorded at 290 K and 1 bar.
